# Supplementary material for: Heat shock protein 70 in Cynops orientalis: Bidirectional thermal regulation and metabolic optimization in amphibian climatic adaptation
Source: Research Square preprint supplement (doi:10.21203/rs.3.rs-6990504/v1), 2025-08-19
Supplement: Supplementary file 1 [file cd9b313acf9f573567a91269.docx]

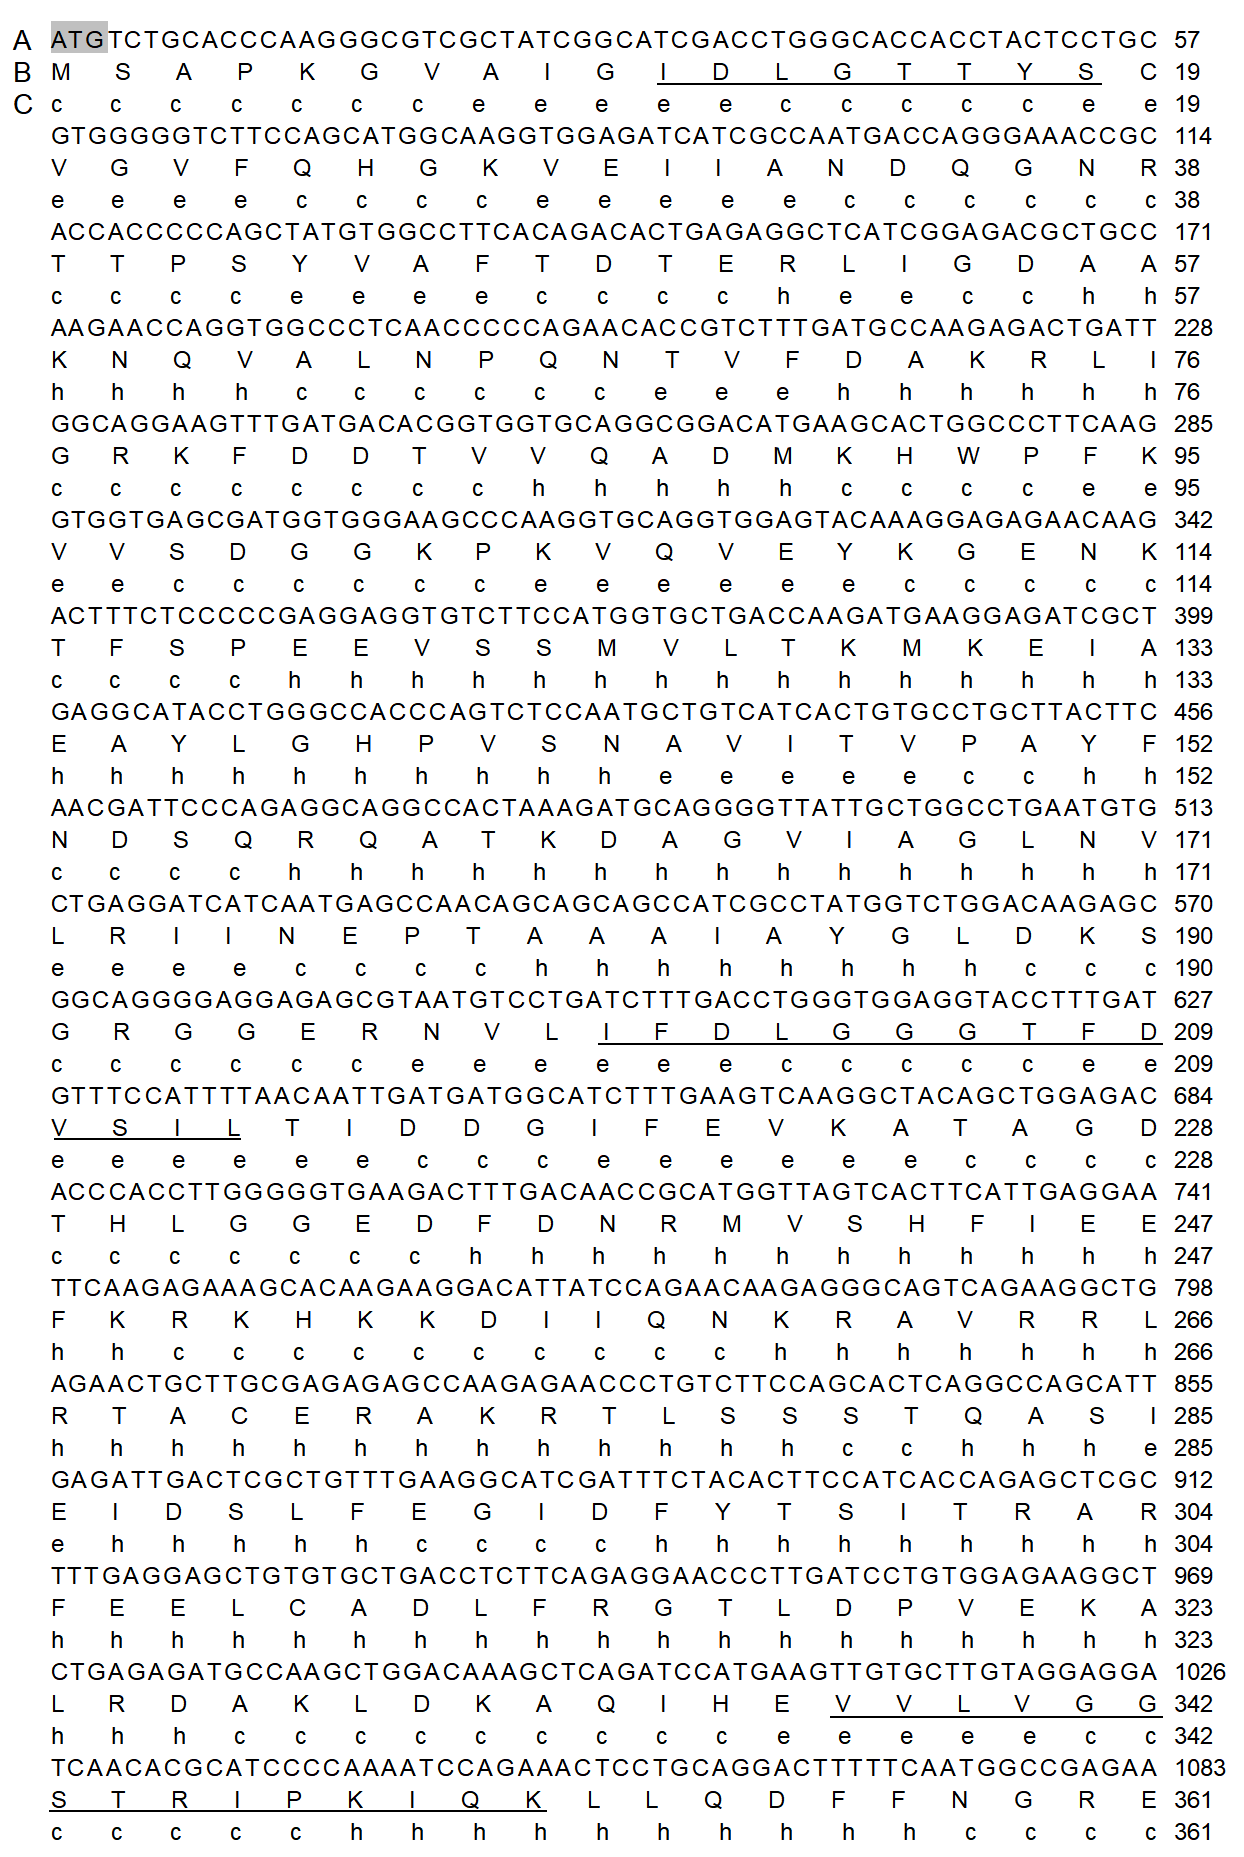


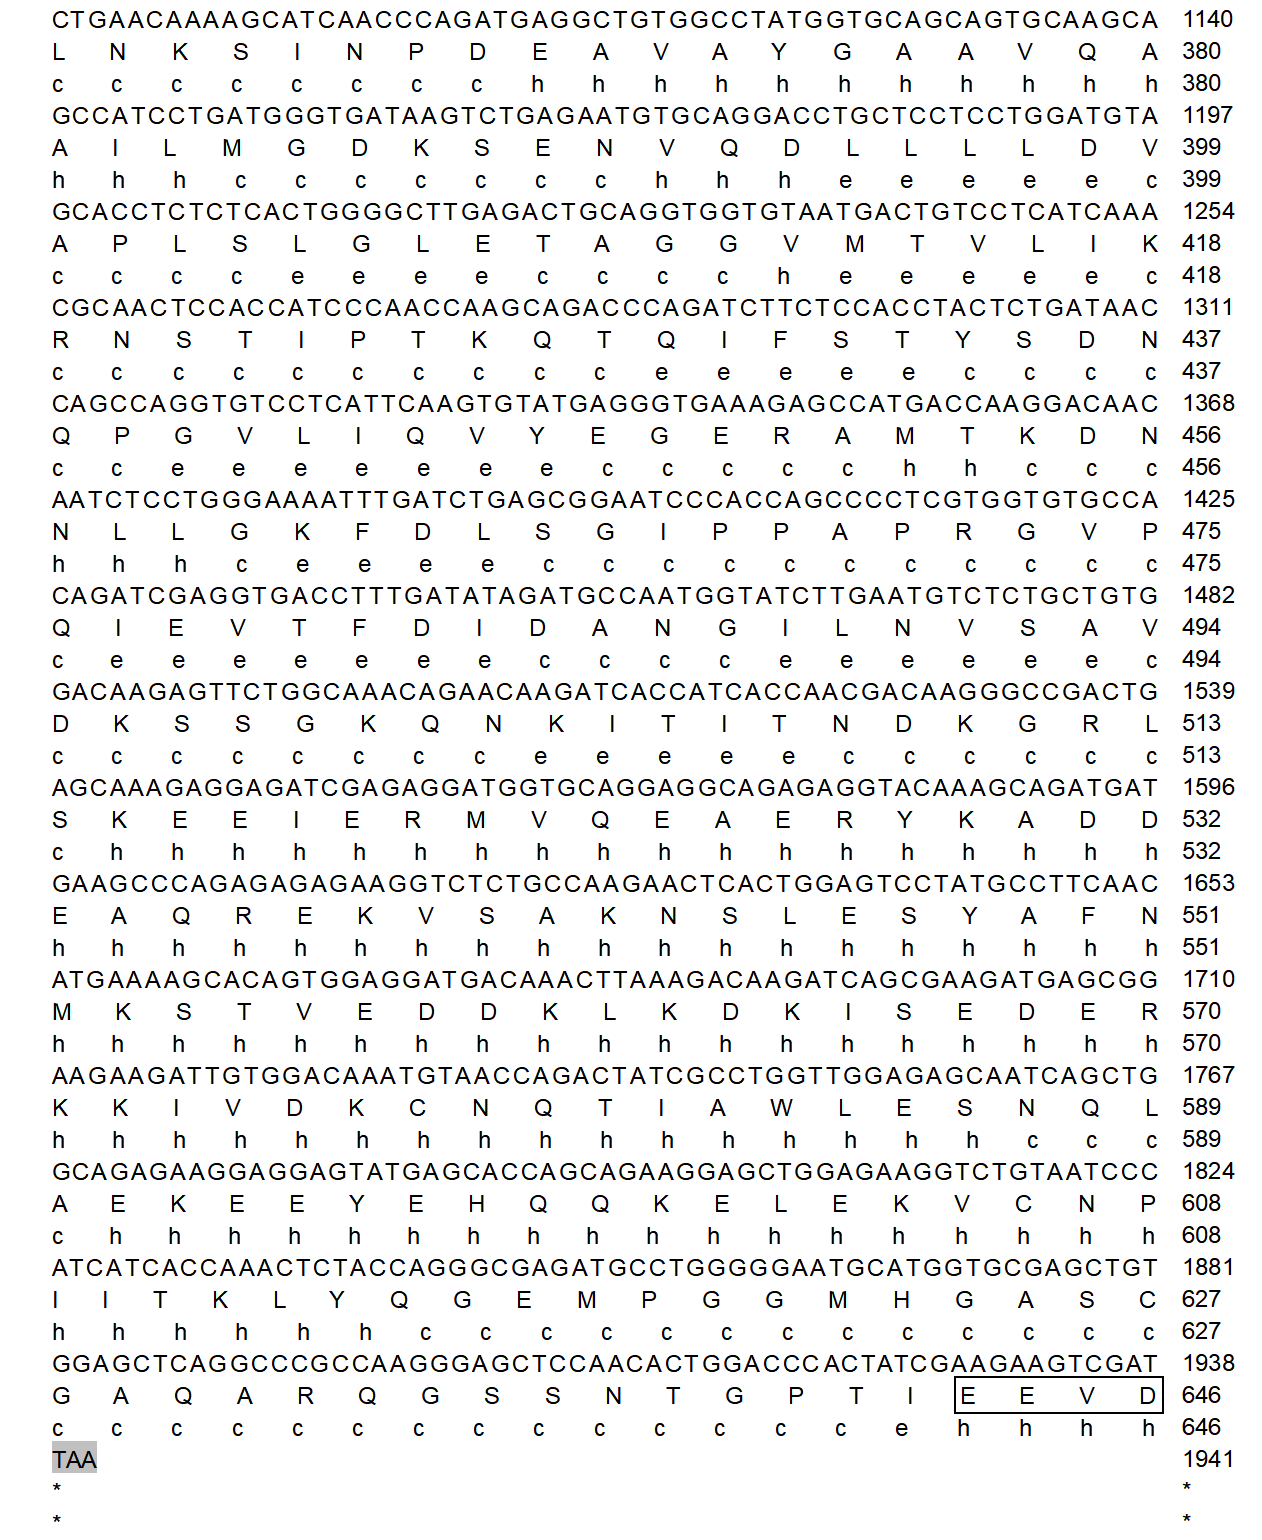


**Fig. S1** Molecular characterization of CoHSP70. (A) Nucleotide sequence of *CoHsp70*. (B) Amino acid sequence of CoHSP70. (C) The secondary structure of CoHSP70. Start codon (ATG) and the stop codon (TAA) was in grey. The three family signature sequences are underlined. The cytosolic HSP70-specific motif is boxed.


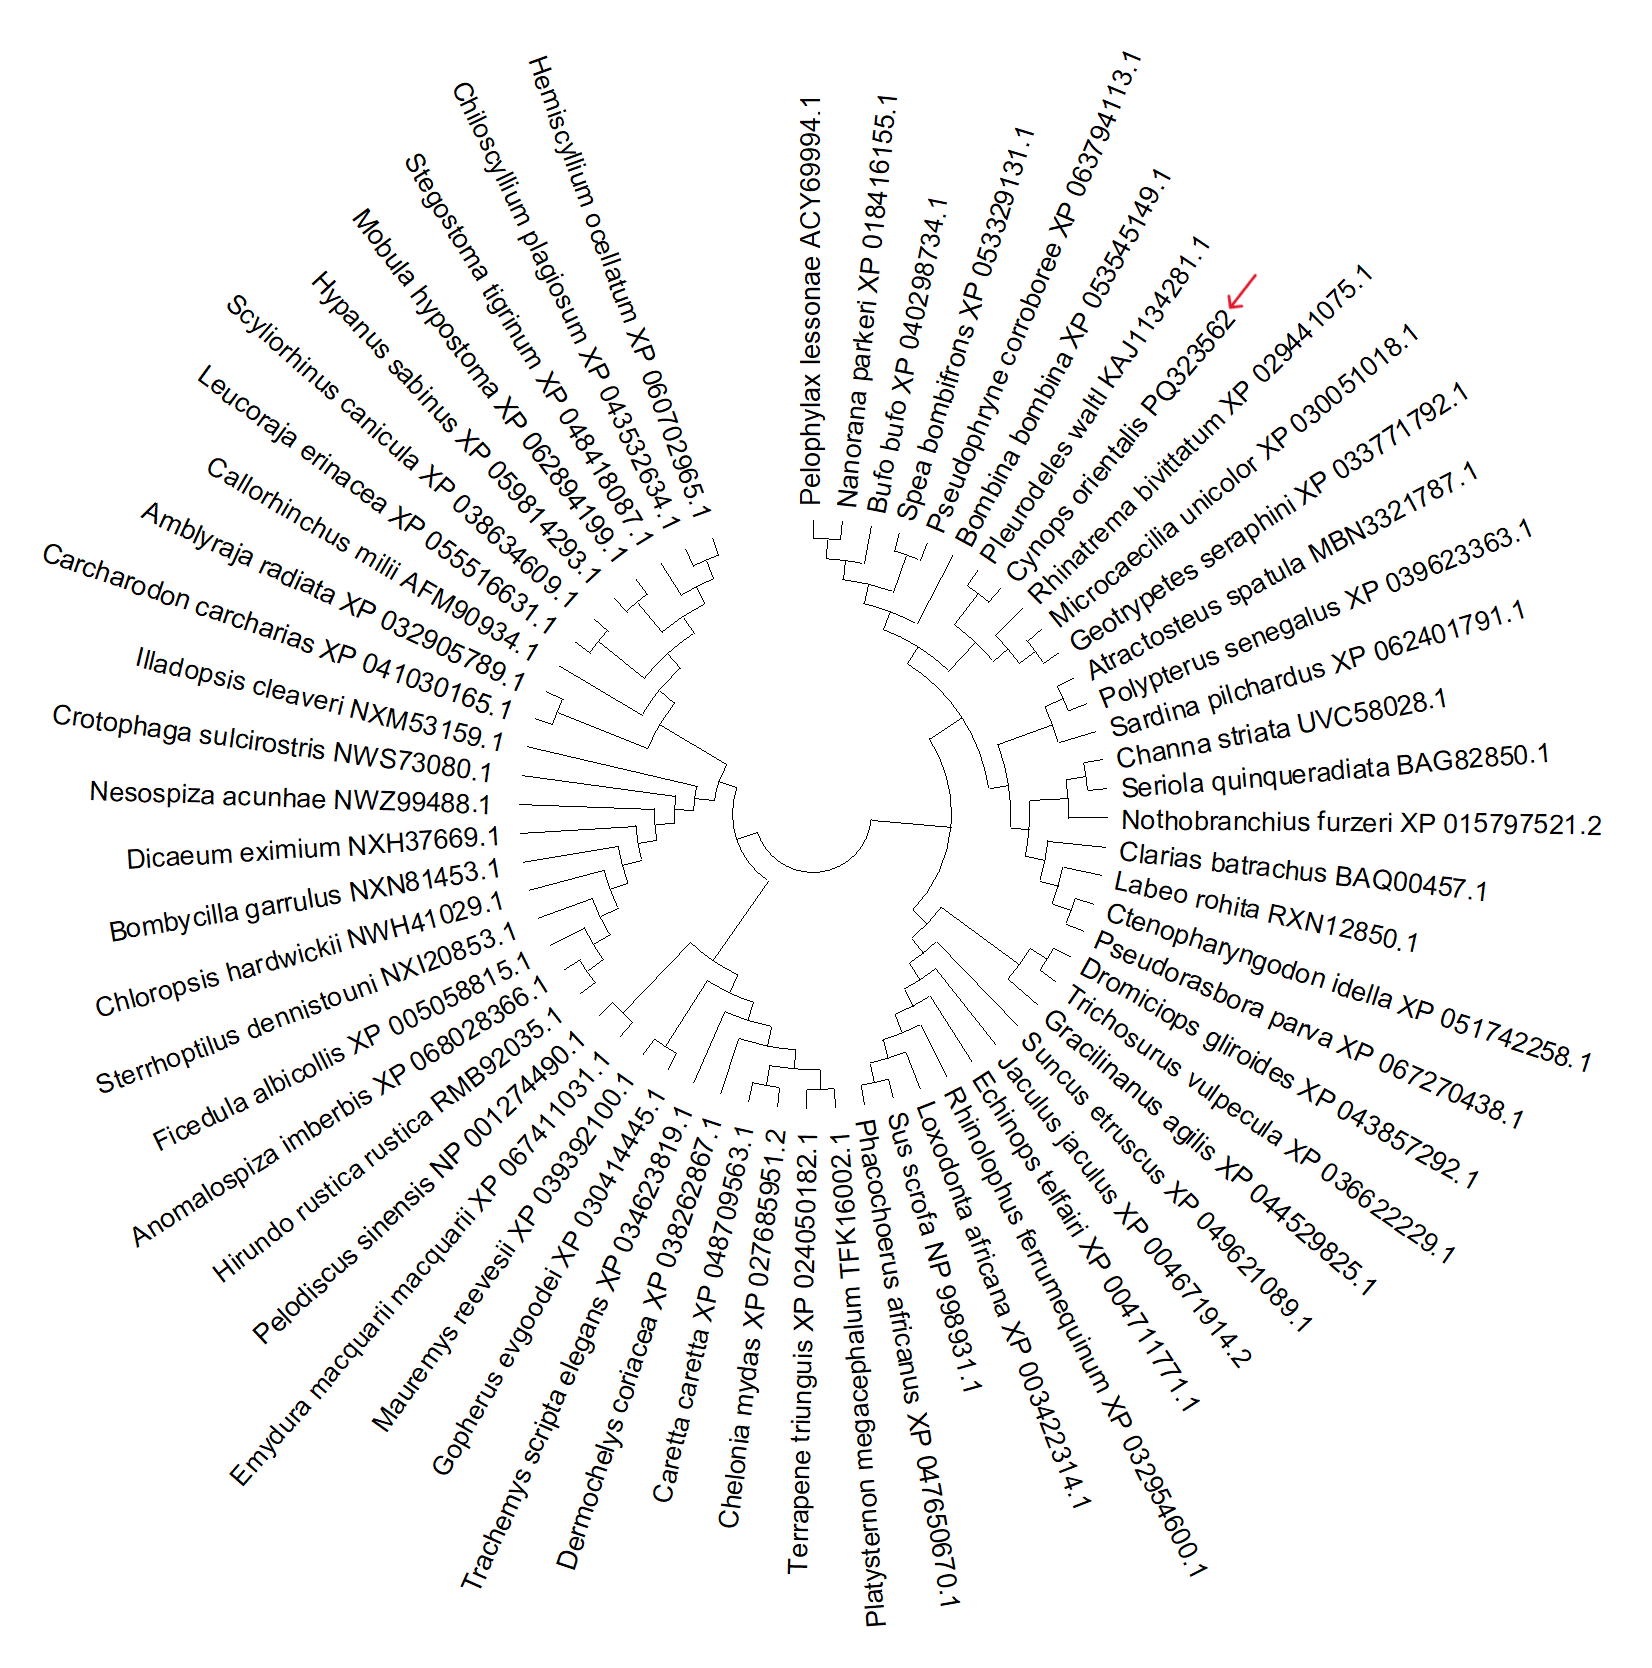


**Fig. S2** Phylogenetic tree of *CoHsp70* across 61 species from six taxonomic classes, constructed using the neighbor-joining (NJ) method in MEGA-11.
